# Supplementary material for: Web 2.0 Tools in the Prevention of Curable Sexually Transmitted Diseases: Scoping Review
Source: PubMed Central journal article supplement (PMC5887040; doi:10.2196/jmir.8871), 2018-03-22
Supplement: jmir_v20i3e113_app1.pdf [file jmir_v20i3e113_app1.pdf]

**Multimedia Appendix 1. Characteristics and main findings of the studies selected for review on Web 2.0 tools in the prevention of curable sexually transmitted diseases (CSTDs).**

| Author, Year                     | Study Type              | Country     | Age                                                                               | Curable STD                         | 2.0 Tools                                   | Period                                                                                 | Intervention made                                                                                                                        | Obtained results                                                                                                                                                 |
|----------------------------------|-------------------------|-------------|-----------------------------------------------------------------------------------|-------------------------------------|---------------------------------------------|----------------------------------------------------------------------------------------|------------------------------------------------------------------------------------------------------------------------------------------|------------------------------------------------------------------------------------------------------------------------------------------------------------------|
| <b>Dowshen et al. 2015 [12]</b>  | Evaluation of study     | USA         | One year before the campaign: 17.23 years<br>In campaign: average age 17.53 years | Chlamydia<br>Gonorrhoea<br>Syphilis | Facebook<br>Twitter<br>Instagram<br>YouTube | Previous the campaign<br>09/2011 – 08/2012<br><br>During campaign<br>09/2012 – 08/2013 | The campaign was announced in social networks and visits to the clinic were compared a year before the campaign and during the campaign. | More than 1,500 individual interactions were due directly to the campaign. CSTD testing was increased substantially in the 2nd period (48.8 vs. 55.6 %, p<0.05). |
| <b>Coughlan et al. 2015 [13]</b> | Comparative case series | New Zealand | >18 years                                                                         | Syphilis                            | Facebook                                    | Since 11/2012 – 05/2013                                                                | Facebook page for syphilis awareness and where to get tested.                                                                            | The number of tests was multiplied by 3 from the campaign. No new cases were reported in the 3 months following the campaign.                                    |
| <b>Habel et al. 2015 [14]</b>    | Prospective Comparative | USA         | Phase 1:<br>>18 years<br><br>Phase 2:<br>18 to 35 years                           | Chlamydia<br>Gonorrhoea             | Facebook                                    | Phase 1:<br>02/2011 – 07/2012<br><br>Phase 2:<br>09/2011 – 08/2012                     | It was announced on Facebook the place where to obtain the test and was compared with the population that goes to the pharmacy to buy it | Both systems had low recruitment.                                                                                                                                |
| <b>Friedman et al. 2014 [15]</b> | Evaluation Study        | USA         | 15 to 25 years                                                                    | CSTD in general                     | Facebook<br>Twitter                         | 04/2008 – 01/2010                                                                      | Campaign for the promotion of CSTD tests.                                                                                                | The 71% increase in tests making on CSTD                                                                                                                         |
| <b>Jones et al. 2012 [16]</b>    | Evaluation Study        | USA         | 15 to 24 years                                                                    | Chlamydia                           | Facebook                                    | 09/2010 – 2011                                                                         | Information on Facebook about infection due to Chlamydia.                                                                                | 23% increase in the use of the condom.<br>54% reduction in positive cases of chlamydia among young people.                                                       |
| <b>Bull et al. 2012 [17]</b>     | Comparative             | USA         | 16 to 25 years                                                                    | Chlamydia<br>Gonorrhoea             | Facebook                                    | 10/2010 – 05/2011                                                                      | Information via messages through Facebook                                                                                                | Increase in the use of condoms in the control group (68% vs 56%, p=0.04) in CSTD prevention.                                                                     |
