# Supplementary material for: Web 2.0 Tools in the Prevention of Curable Sexually Transmitted Diseases: Scoping Review
Source: PubMed Central journal article supplement (PMC5887040; doi:10.2196/jmir.8871), 2018-03-22
Supplement: jmir_v20i3e113_app2.pdf [file jmir_v20i3e113_app2.pdf]

Multimedia Appendix 2. Methodological quality of the studies through the 22-point assessment of the STROBE Guide.

| Article              | Score of the questionnaire Items <sup>a</sup> |   |   |   |   |   |   |   |   |    |    |     |      |      |    |     |    |    |    |    |    |    | TOTAL | %     |
|----------------------|-----------------------------------------------|---|---|---|---|---|---|---|---|----|----|-----|------|------|----|-----|----|----|----|----|----|----|-------|-------|
|                      | 1                                             | 2 | 3 | 4 | 5 | 6 | 7 | 8 | 9 | 10 | 11 | 12  | 13   | 14   | 15 | 16  | 17 | 18 | 19 | 20 | 21 | 22 |       |       |
| Dowshen et al. [12]  | 0.5                                           | 1 | 1 | 1 | 1 | 1 | 0 | 0 | 0 | 1  | 1  | 0.6 | 0    | 0.2  | 0  | 0.5 | 1  | 1  | 1  | 0  | 1  | 1  | 13.80 | 62.73 |
| Coughlan et al. [13] | 0.5                                           | 1 | 1 | 1 | 1 | 1 | 0 | 0 | 0 | 1  | 0  | 0.4 | 0.66 | 0.66 | 0  | 0   | 0  | 1  | 1  | 1  | 1  | 1  | 13.22 | 60.09 |
| Habel et al. [14]    | 0.5                                           | 1 | 1 | 1 | 1 | 1 | 0 | 0 | 0 | 1  | 0  | 0.2 | 0.66 | 0.5  | 0  | 0   | 0  | 1  | 0  | 1  | 0  | 0  | 9.86  | 44.82 |
| Friedman et al. [15] | 0.5                                           | 1 | 0 | 0 | 1 | 0 | 0 | 1 | 0 | 0  | 1  | 0   | 0.33 | 0.5  | 0  | 0   | 0  | 1  | 1  | 1  | 0  | 0  | 8.33  | 37.86 |
| Jones et al. [16]    | 0.5                                           | 1 | 0 | 1 | 1 | 1 | 1 | 1 | 1 | 1  | 1  | 0.6 | 0    | 1    | 1  | 1   | 0  | 1  | 1  | 1  | 0  | 0  | 16.10 | 73.18 |
| Bull et al. [17]     | 0.5                                           | 1 | 1 | 0 | 1 | 1 | 1 | 1 | 0 | 1  | 1  | 1   | 1    | 0.5  | 1  | 1   | 0  | 1  | 1  | 0  | 1  | 1  | 17.00 | 77.27 |

<sup>a</sup>0 = It doesn't accomplish; 0 to 1 = partially meets the item; 1 = meets the item entirely
